# Supplementary material for: In Vitro Suppression of T Cell Proliferation Is a Conserved Function of Primary and Immortalized Human Cancer-Associated Fibroblasts
Source: MDPI journal article supplement (doi:10.3390/ijms22041827), 2021-02-12
Supplement: s1 [file s1]

### Supplementary Table 1

[illegible]
